# Supplementary material for: Terminalia Chebula provides protection against dual modes of necroptotic and apoptotic cell death upon death receptor ligation
Source: PubMed Central journal article supplement (PMC4846877; doi:10.1038/srep25094), 2016-04-27
Supplement: srep25094-s1.pdf [file srep25094-s1.pdf]

***Terminalia Chebula* provides protection against dual modes of necroptotic and apoptotic cell death upon death receptor ligation**

Yoonjung Lee<sup>1,#</sup>, Hee Sun Byun<sup>1,#</sup>, Jeong Ho Seok<sup>1,#</sup>, Kyeong Ah Park<sup>1</sup>, Minho Won<sup>1</sup>, Wonhyoung Seo<sup>1</sup>, So-Ra Lee<sup>1</sup>, Kidong Kang<sup>1</sup>, Kyung-Cheol Sohn<sup>2</sup>, Ill Young Lee<sup>3</sup>, Hyeong-Geug Kim<sup>4</sup>, Chang Gue Son<sup>4</sup>, Han-Ming Shen<sup>5</sup>, Gang Min Hur<sup>1\*</sup>

**Supplementary Figure 1. Structure of six constituents in *Terminalia Chebula* extract**

**Supplementary Figure 2. Calibration curves of six reference compounds.** The constituents of WETC were serially diluted at the indicated concentration ranges. HPLC analysis was performed with a Gemini C18 column at 276 nm to calculate each peak area. Insets represent the regression equation ( $y = ax + b$ ) with the correlation coefficient ( $r^2$ ).

**Supplementary Figure 3. Dot plot analysis using forward and side scatter light parameters (FSC versus SSC) under TNF-induced necroptotic conditions in L929 cells and MEFs.** (A) L929 cells were pretreated with a pancaspase inhibitor (z-VAD-FMK, 20  $\mu$ M), a necroptosis inhibitor (Nec-1, necrostatin-1, 10  $\mu$ M) or WETC (0.4 mg/mL), followed by TNF (15 ng/mL) for another 8 h. (B) MEFs were pretreated with Nec-1 (10  $\mu$ M) or WETC (0.4 mg/mL) for 30 min, and then treated with z-VAD-FMK (20  $\mu$ M), TNF (15 ng/mL) and cycloheximide (CHX, 10  $\mu$ g/mL) for 18 h. (C) L929 cells were treated with TNF (15 ng/mL) for indicated times. (D) L929 cells were pretreated with WETC (0.4 mg/mL) or mitochondria-targeted antioxidant Mito-TEMPO (100  $\mu$ M) for 30 min,

followed by TNF (15 ng/mL) for another 6 h. (E) L929 cells were treated with TNF (15 ng/mL) in the absence or presence of the WETC constituents for 6 h. The population and distribution of cells were analyzed in the scatter plot of FSC vs. SSC by flow cytometry.

**Supplementary Figure 4. Inhibitory effects of the constituents of WETC on TNF-induced necroptotic cell death in MEFs.** MEFs were pretreated with WETC or indicated WETC constituents for 30 min, followed by z-VAD-FMK (20  $\mu$ M), TNF (15 ng/mL) and cycloheximide (CHX, 10  $\mu$ g/mL) for 18 h. Cells were trypsinized and collected in PBS, and cell death was quantified by trypan blue exclusion assay. Data represent the mean  $\pm$  SE of three independent experiments. \*,  $P < 0.05$ , compared with TNF/CHX/z-VAD-FMK-treated group.

**Supplementary Figure 5. Dot plot analysis using forward and side scatter light parameters (FSC versus SSC) under DR-mediated apoptotic conditions in HeLa cells.** HeLa cells were treated with TNF (15 ng/mL) plus CHX (10  $\mu$ g/mL) or TRAIL (500 ng/mL) in the absence or presence of WETC (0.4 mg/mL) for 8 h. The population and distribution of cells were analyzed in the scatter plot of FSC vs. SSC by flow cytometry.

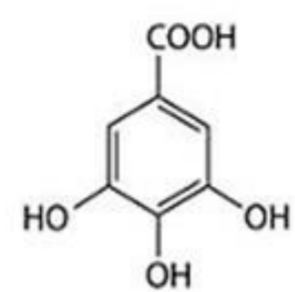

Gallic acid

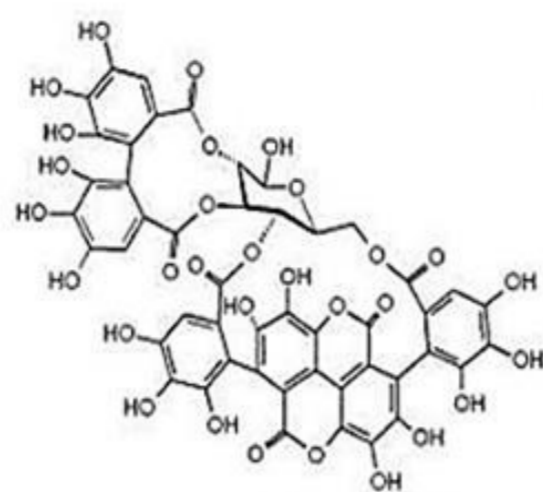

Punicalagin

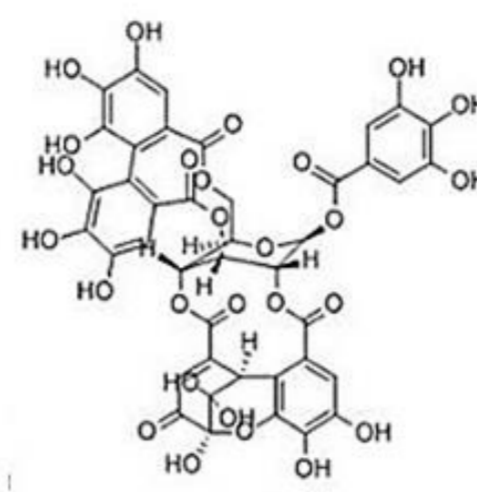

Geraniin

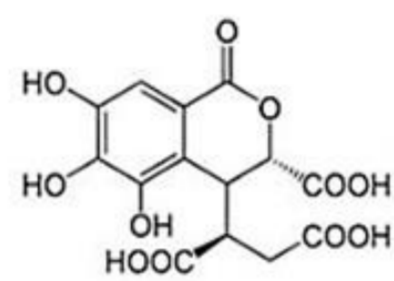

Chebulic acid

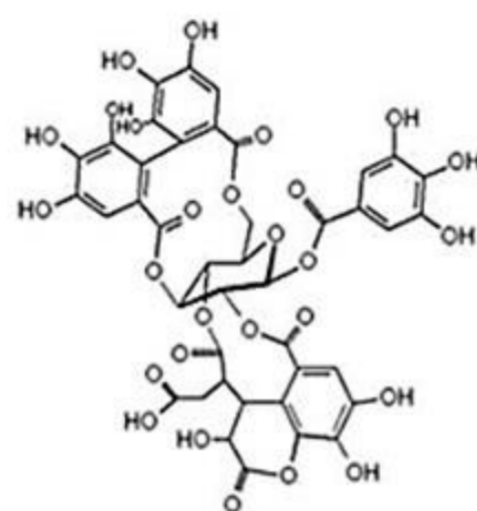

Chebulagic acid

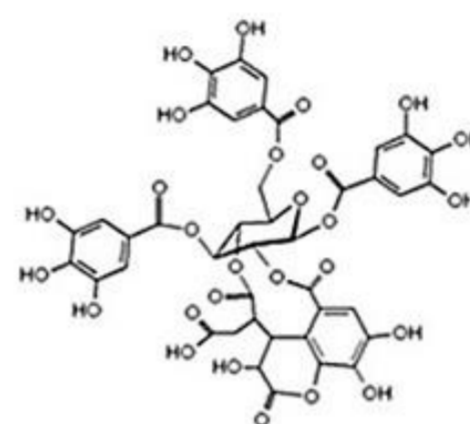

Chebulinic acid

**Supplementary Figure 1. Structure of six constituents in *Terminalia Chebula* extract**

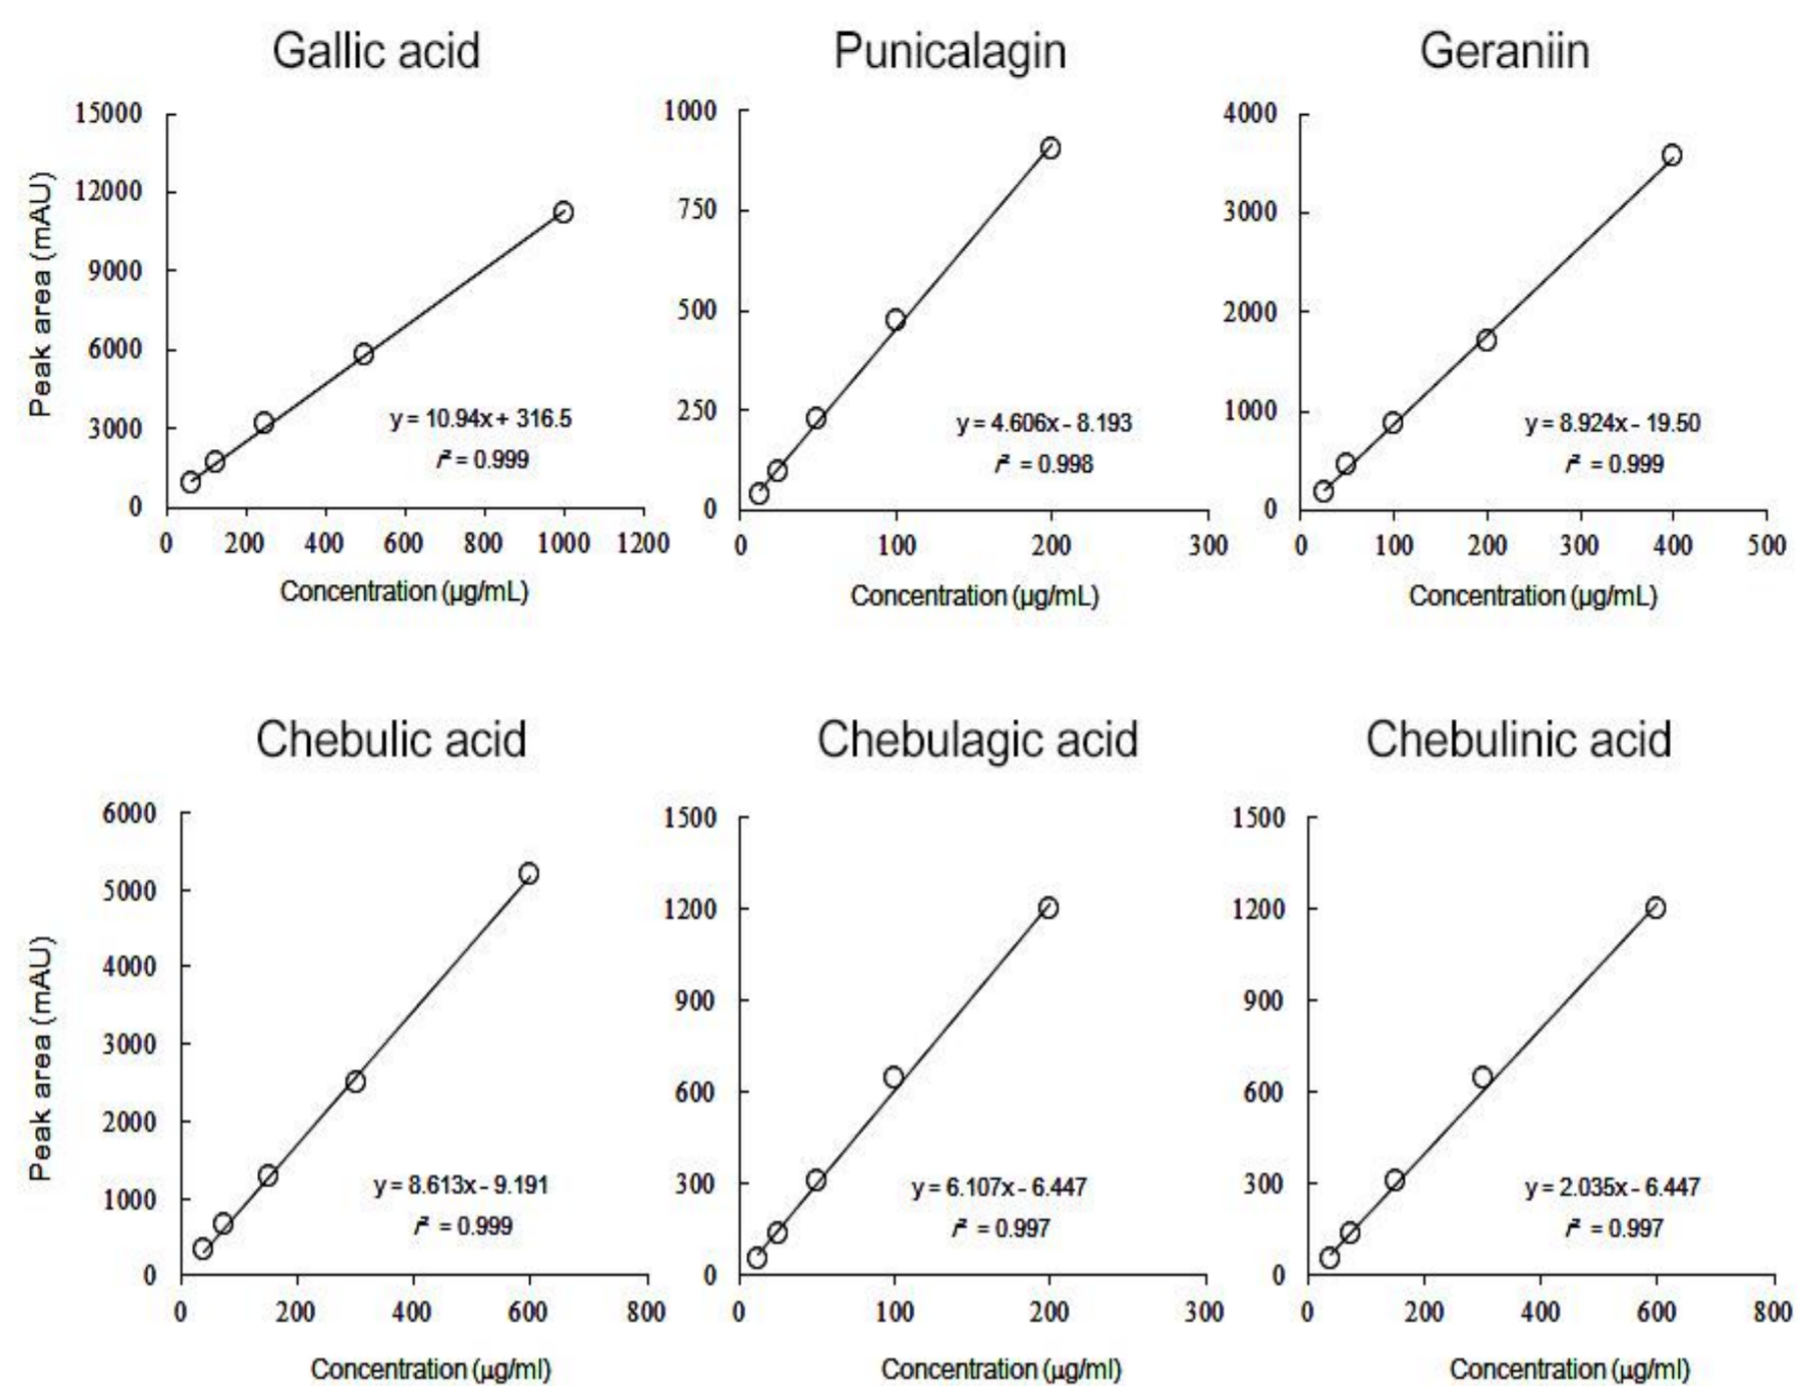

**Supplementary Figure 2. Calibration curves of six reference compounds.** The constituents of WETC were serially diluted at the indicated concentration ranges. HPLC analysis was performed with a Gemini C18 column at 276 nm to calculate each peak area. Insets represent the regression equation ( $y = ax + b$ ) with the correlation coefficient ( $r^2$ ).

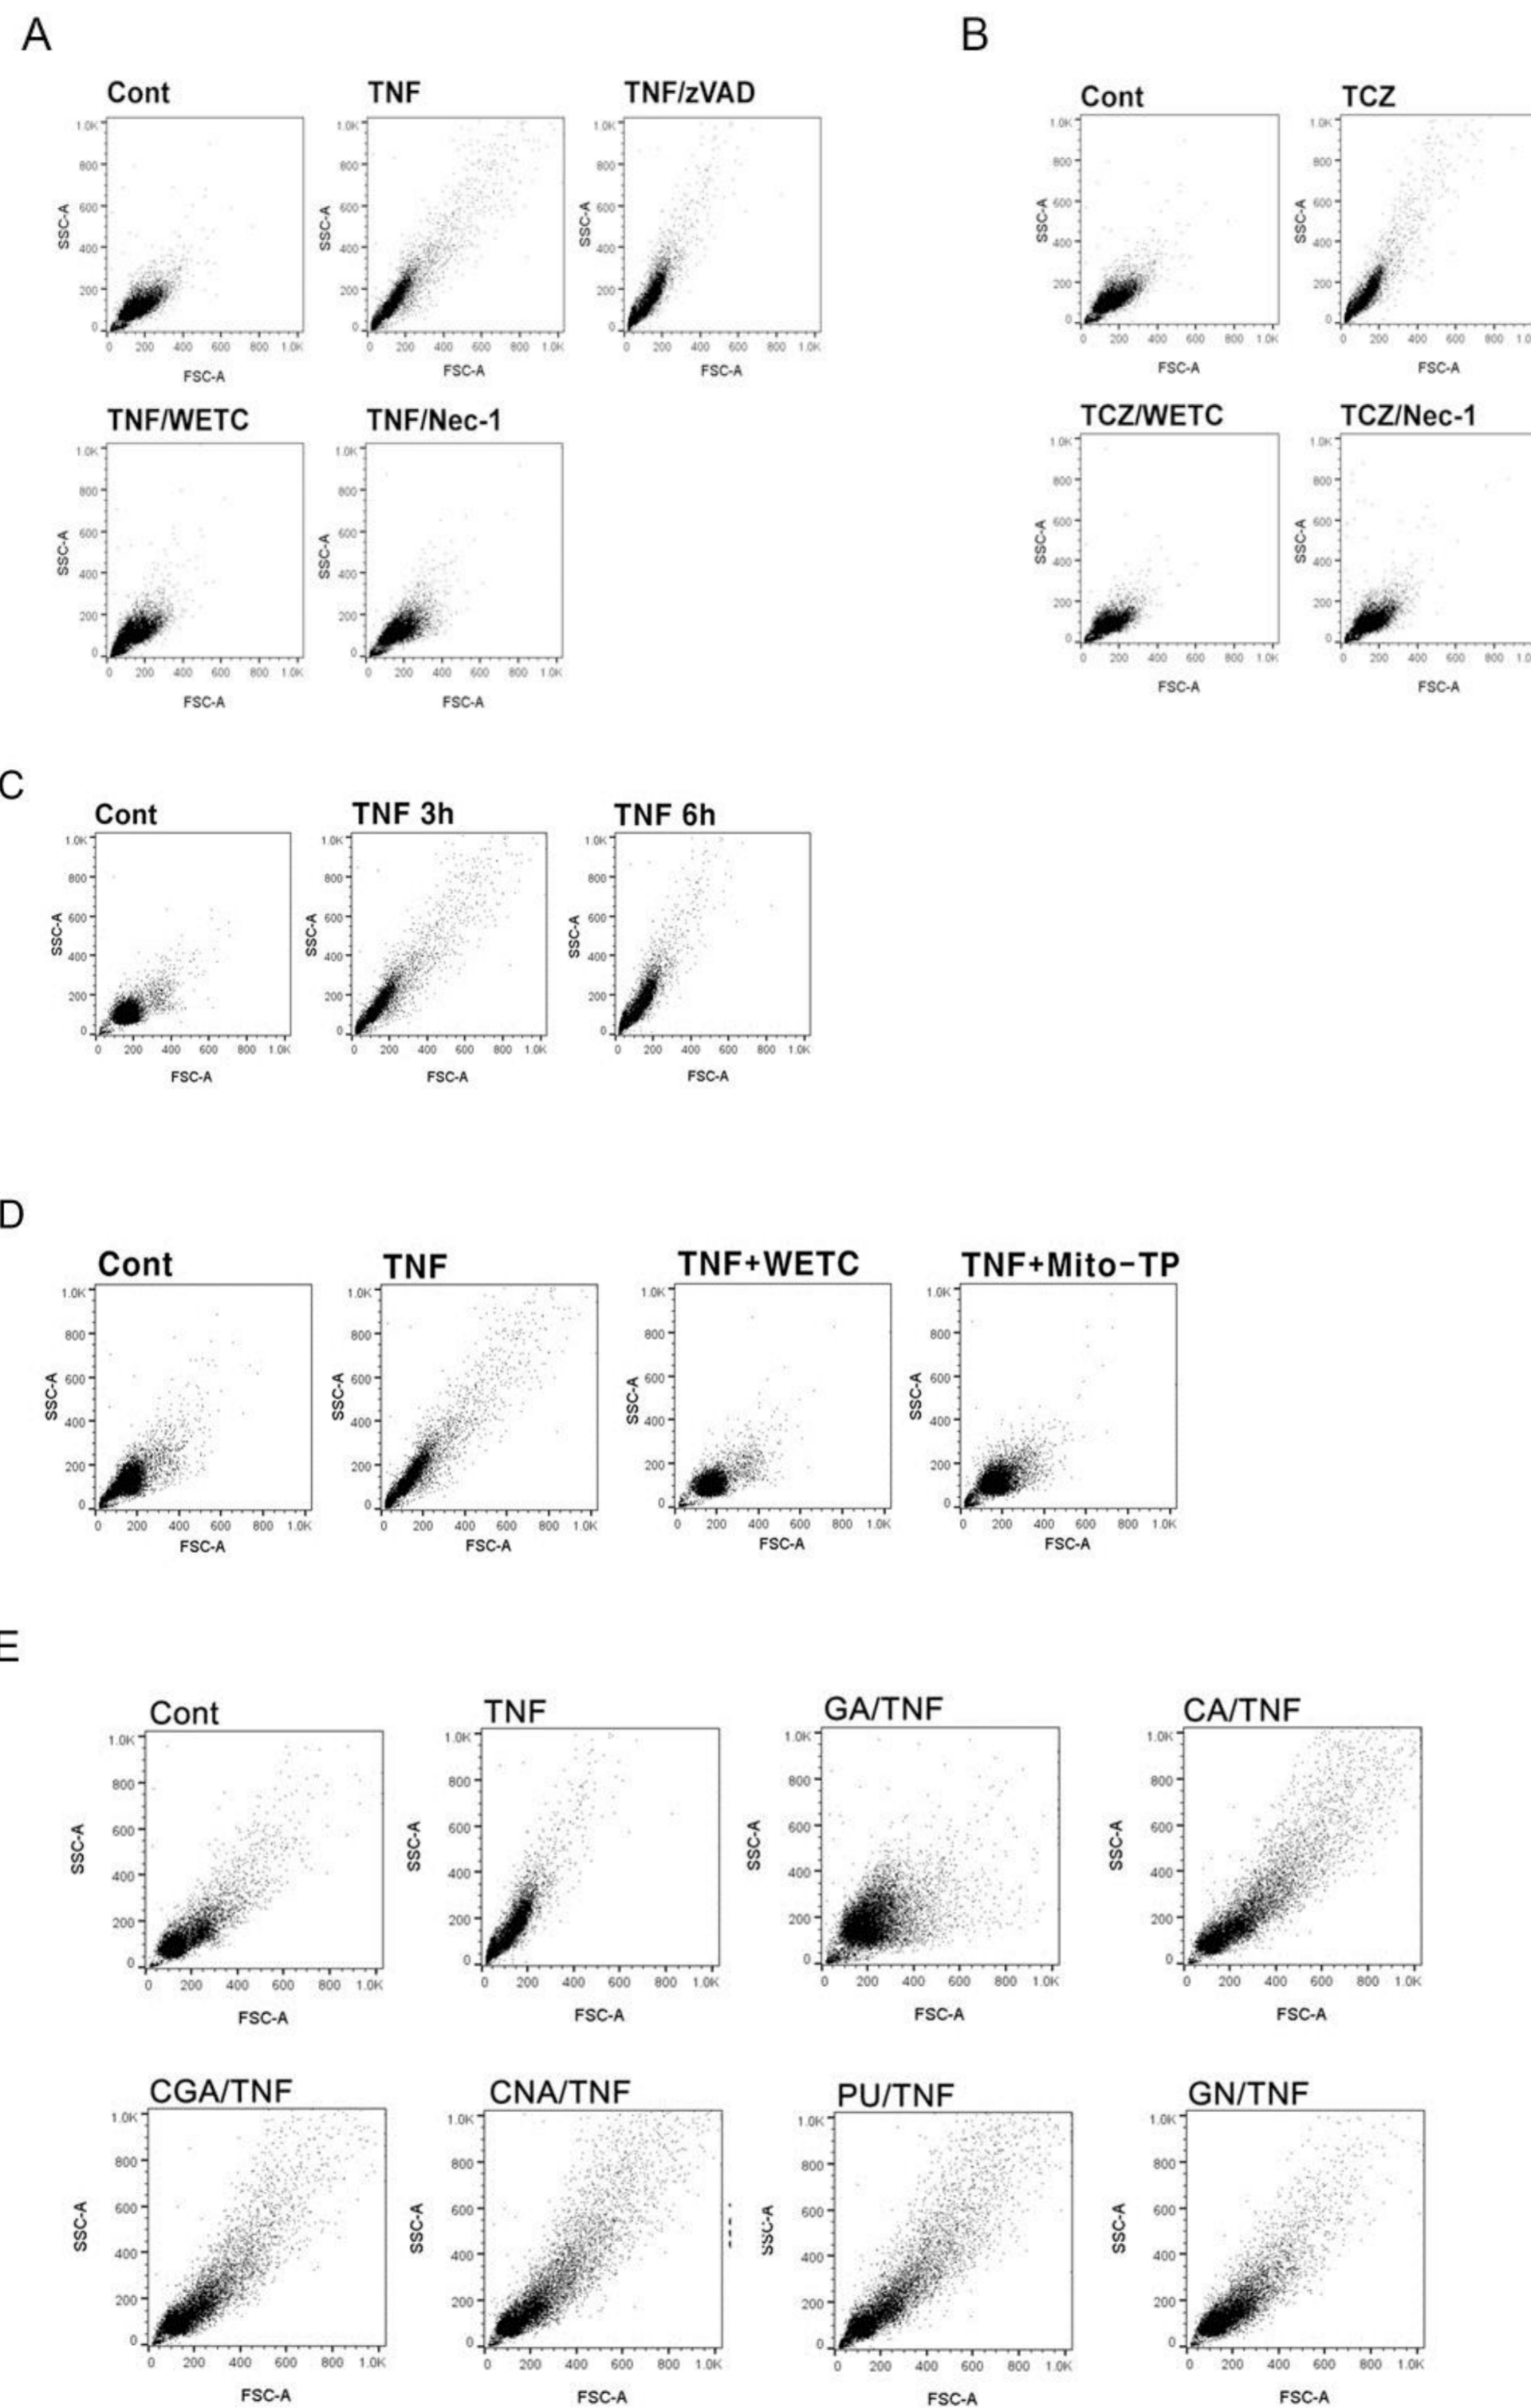

**Supplementary Figure 3. Dot plot analysis using forward and side scatter light parameters (FSC versus SSC) under TNF-induced necroptotic conditions in L929 cells and MEFs.** (A) L929 cells were pretreated with a pancaspase inhibitor (z-VAD-FMK, 20  $\mu$ M), a necroptosis inhibitor (Nec-1, necrostatin-1, 10  $\mu$ M) or WETC (0.4 mg/mL), followed by TNF (15 ng/mL) for another 8 h. (B) MEFs were pretreated with Nec-1 (10  $\mu$ M) or WETC (0.4 mg/mL) for 30 min, and then treated with z-VAD-FMK (20  $\mu$ M), TNF (15 ng/mL) and cycloheximide (CHX, 10  $\mu$ g/mL) for 18 h. (C) L929 cells were treated with TNF (15 ng/mL) for indicated times. (D) L929 cells were pretreated with WETC (0.4 mg/mL) or mitochondria-targeted antioxidant Mito-TEMPO (100  $\mu$ M) for 30 min, followed by TNF (15 ng/mL) for another 6 h. (E) L929 cells were treated with TNF (15 ng/mL) in the absence or presence of the WETC constituents for 6 h. The population and distribution of cells were analyzed in the scatter plot of FSC vs. SSC by flow cytometry.

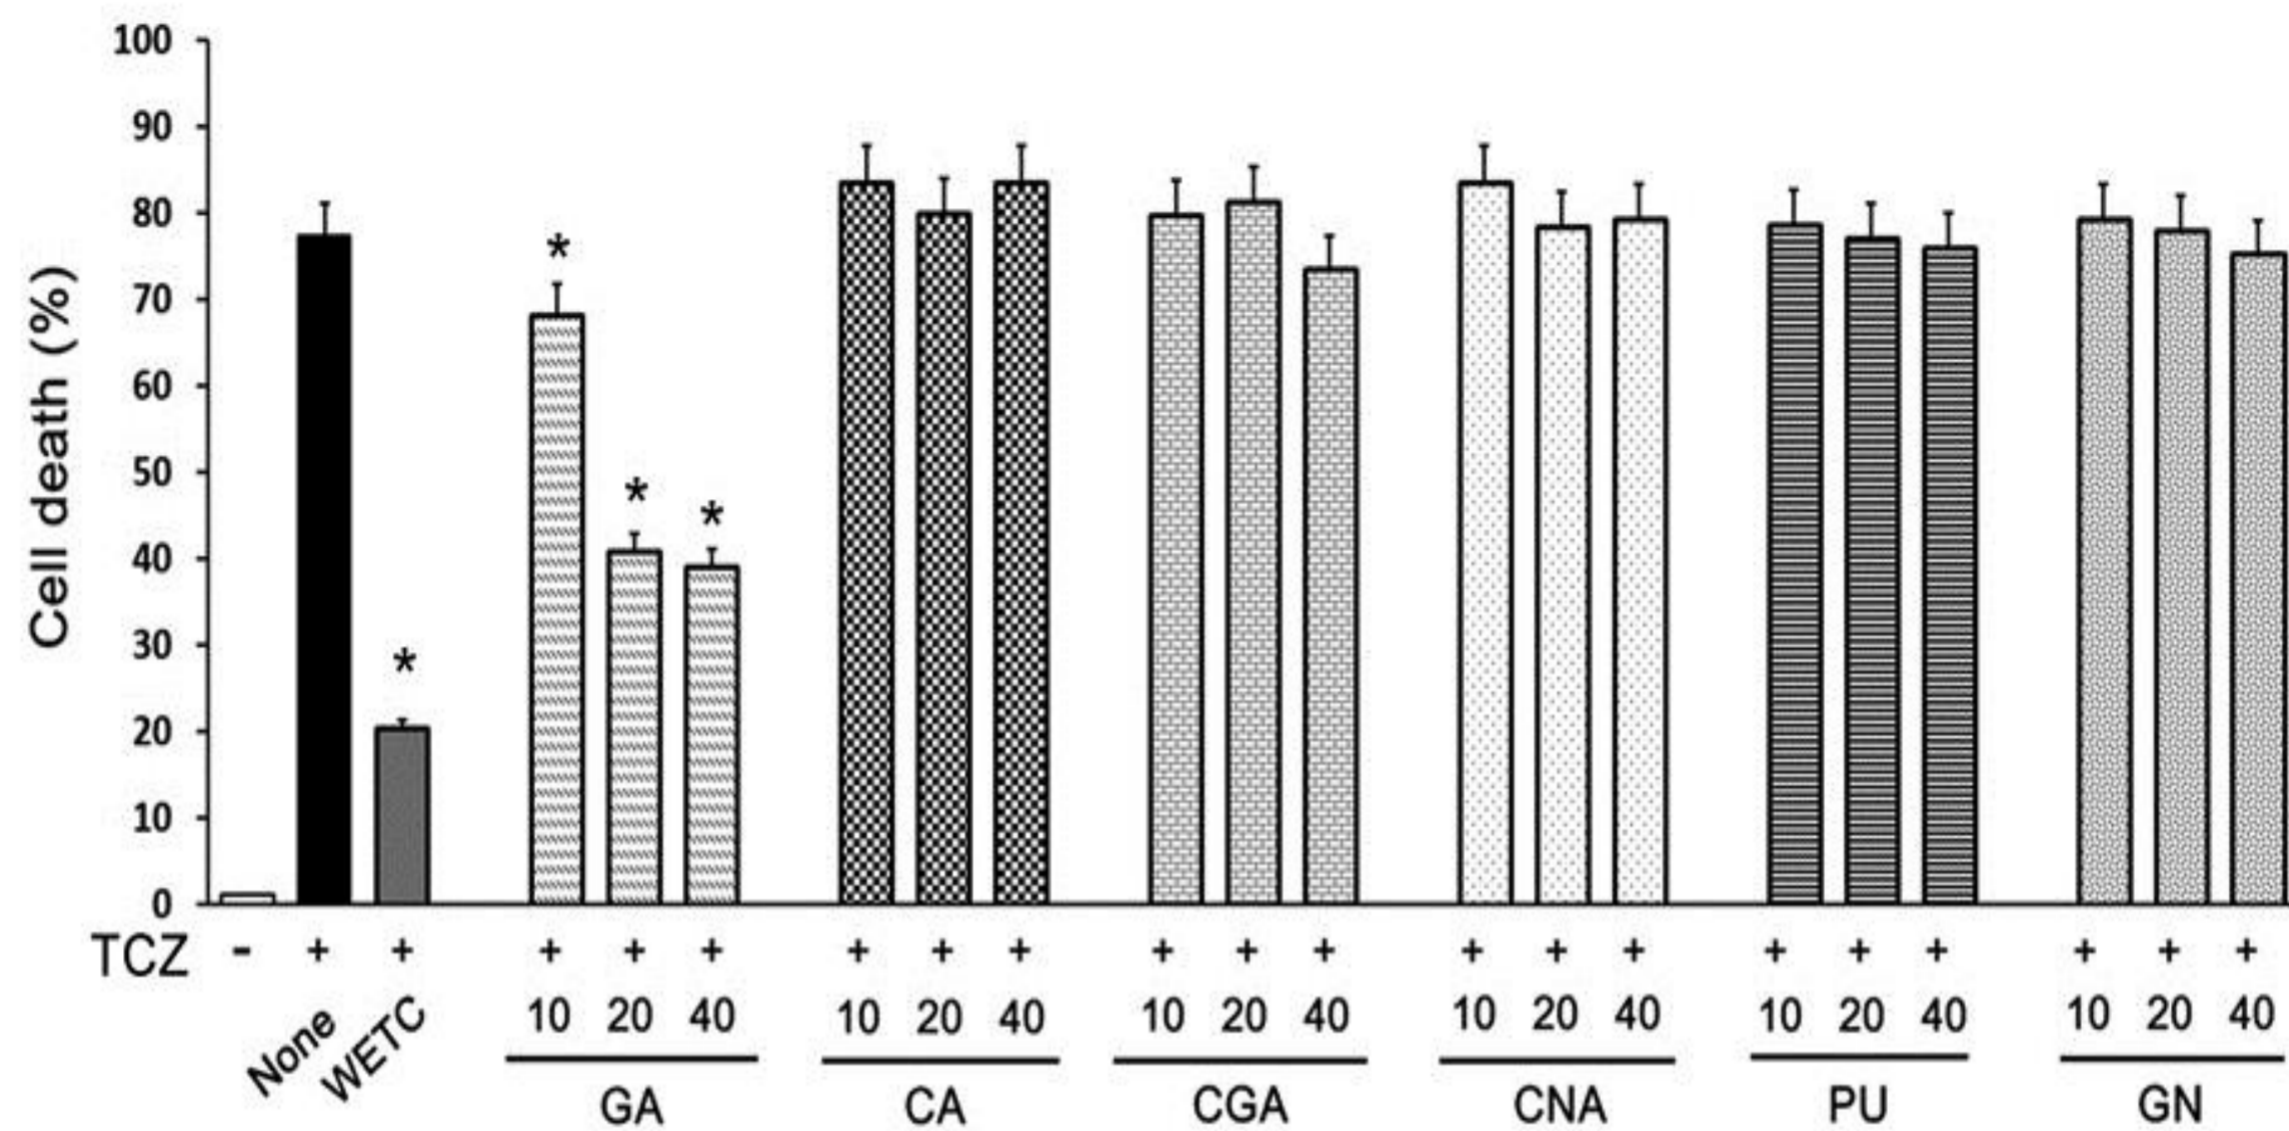

**Supplementary Figure 4. Inhibitory effects of the constituents of WETC on TNF-induced necroptotic cell death in MEFs.** MEFs were pretreated with WETC or indicated WETC constituents for 30 min, followed by z-VAD-FMK (20  $\mu$ M), TNF (15 ng/mL) and cycloheximide (CHX, 10  $\mu$ g/mL) for 18 h. Cells were trypsinized and collected in PBS, and cell death was quantified by trypan blue exclusion assay. Data represent the mean  $\pm$  SE of three independent experiments. \*,  $P < 0.05$ , compared with TNF/CHX/z-VAD-FMK-treated group.



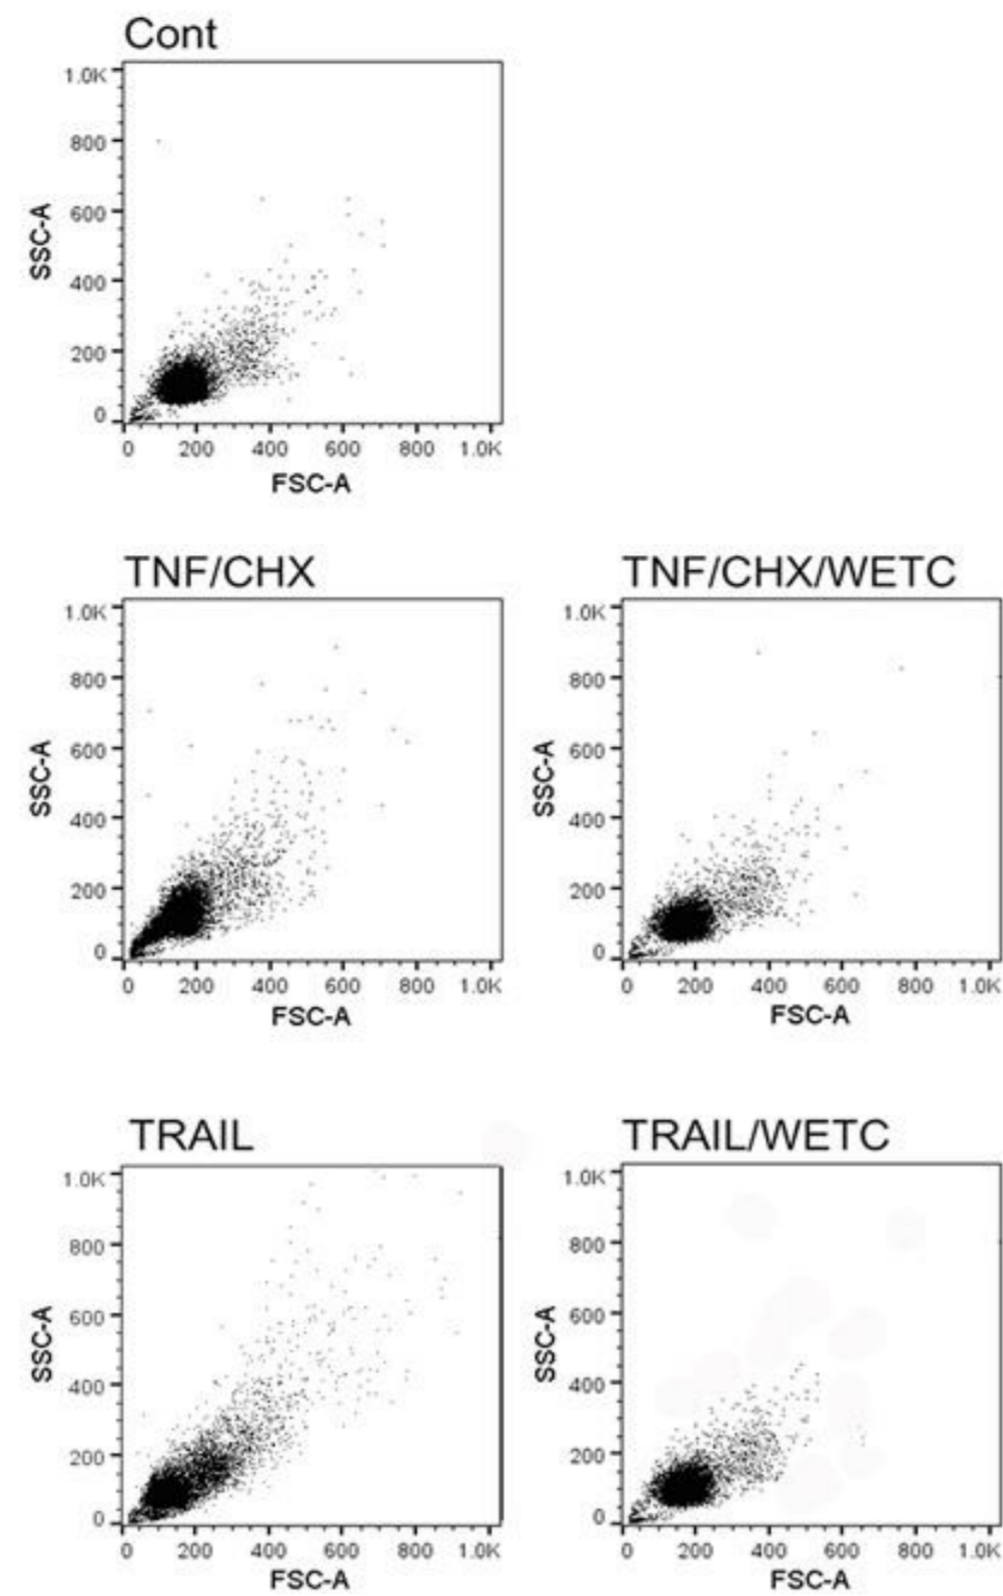

**Supplementary Figure 5. Dot plot analysis using forward and side scatter light parameters (FSC *versus* SSC) under DR-mediated apoptotic conditions in HeLa cells.** HeLa cells were treated with TNF (15 ng/mL) plus CHX (10 μg/mL) or TRAIL (500 ng/mL) in the absence or presence of WETC (0.4 mg/mL) for 8 h. The population and distribution of cells were analyzed in the scatter plot of FSC vs. SSC by flow cytometry.
